# Supplementary material for: Novel O-GlcNAcylation on Ser40 of canonical H2A isoforms specific to viviparity
Source: PubMed Central journal article supplement (PMC5018834; doi:10.1038/srep31785), 2016-09-12

1 **Title**

2 **Novel *O*-GlcNAcylation on Ser<sup>40</sup> of canonical H2A isoforms specific to viviparity.**

3

4 **Authors**

5 Mitsuko Hirose\*, Koji Hayakawa\*, Chikako Yoneda, Daisuke Arai, Hitoshi Shiota, Takehiro

6 Suzuki, Satoshi Tanaka, Naoshi Dohmae, Kunio Shiota

7 (\*These authors contributed equally to this work)

8

9

10 **Supplementary Figure legends**

11 **Supplementary data Figure 1. Antigen specificity assay of the 20B2 monoclonal antibody**  
12 **and a phylogeny of H2A isoforms.**

13 **a**, Synthetic peptides with (GP) or without (NP) *O*-GlcNAcylation were subjected to ELISA

14 using 20B2 as a primary antibody. **b**, WB analysis of mESC whole-cell lysates with 20B2.

15 There is a 20B2-positive band (left lane). The 20B2 band was vanished by pre-incubation with

16 GP (1 µg/ml) (right lane). **c**, WB analysis with 20B2 (left lane) and silver stained (right lane)

17 crude histone extracts of mESCs. **d**, Purified Flag-tagged recombinant H2A3 produced by

18 mESC (ES-FLAG H2A3, blue) was subjected to ELISA using 20B2 as a primary antibody. We

19 used anti-FLAG antibody to normalize H2A3 levels. *E. coli* recombinant proteins (*E. coli*-

20 FLAG H2A3, orange) were used for negative control of *O*-GlcNAc modification. **e**, Amino acid

21 sequence-based phylogeny of genes for mouse canonical H2A isoforms. The amino acid at

22 position 40 (Ser<sup>40</sup> or Ala<sup>40</sup>) and the gene cluster numbers are shown in the right margin.

23

24 **Supplementary data Figure 2. Mass spectrometry of G37-K74 peptide on H2A.**

25 Summary of the theoretical values of MS/MS fragments of G37-K74 peptide. The observed ions  
26 in Fig. 2b and 2c are written in red.

27

28 **Supplementary data Figure 3. Phylogeny of H2A isoforms of animals.**

29 Phylogenetic relationship of canonical H2A proteins in selected animal species (human,  
30 macaque, cow, horse, rat, mouse, wallaby, platypus, chicken, frog or *Xenopus*, zebrafish, and  
31 fruit fly). The amino acid at position 40 (Ser<sup>40</sup> or Ala<sup>40</sup>) and the cluster numbers of genes for  
32 respective H2A isoforms are shown in the right margin.

33

34 **Supplementary data Figure 4. ChIP-seq analysis of TS and dTS.**

35 **a**, As the validation of 20B2 for ChIP, mESC chromatin (an equivalent amount of 1 µg genomic  
36 DNA) and 3 µg of 20B2 were used. The 20B2-positive band (IP) was vanished when 20B2 was  
37 pre-incubated with GP (IP+GP, 3 µg GP), but not with NP (IP+NP, 3 µg GP). Mouse IgG as a  
38 negative control. **b**, Shearing check of chromatin used in ChIP-seq. There was no long chromatin  
39 in both TS and dTS samples. **c**, The gene ontology enrichment analysis of biological processes  
40 and KEGG pathway analysis of genes harbouring H2AS40Gc. Top five categories for each  
41 analysis of TS-specific and dTS-specific target genes. **d**, H2AS40Gc target genes in dTS related  
42 to the Wnt signal pathway (red boxes).

43

44 **Supplementary data Figure 5. Schematic model for the acquisition of H2A Ser<sup>40</sup> O-**

45 **GlcNAcylation in the evolutionary process.** The emergence of the Ser<sup>40</sup> isoform of canonical  
46 H2A and its O-GlcNAcylation occurred at the time of the acquisition of placenta. In the histone  
47 octamer, two H2A molecules interact at the L1 loop of the globular domain where S40 can be  
48 O-GlcNAcylated. H2AS40Gc may produce complexity of the chromatin through the variety of  
49 nucleosomes.

50

51 **Supplementary data Table 1. Primer lists.** For construction of 3xFlag-fused H2A3 and H2A3-  
52 mutant overexpression vectors <sup>a-e</sup>, same alphabet indicate that primer is used as the combination.

53

54 **Supplementary Information.** Uncropped images with size maker indications

55

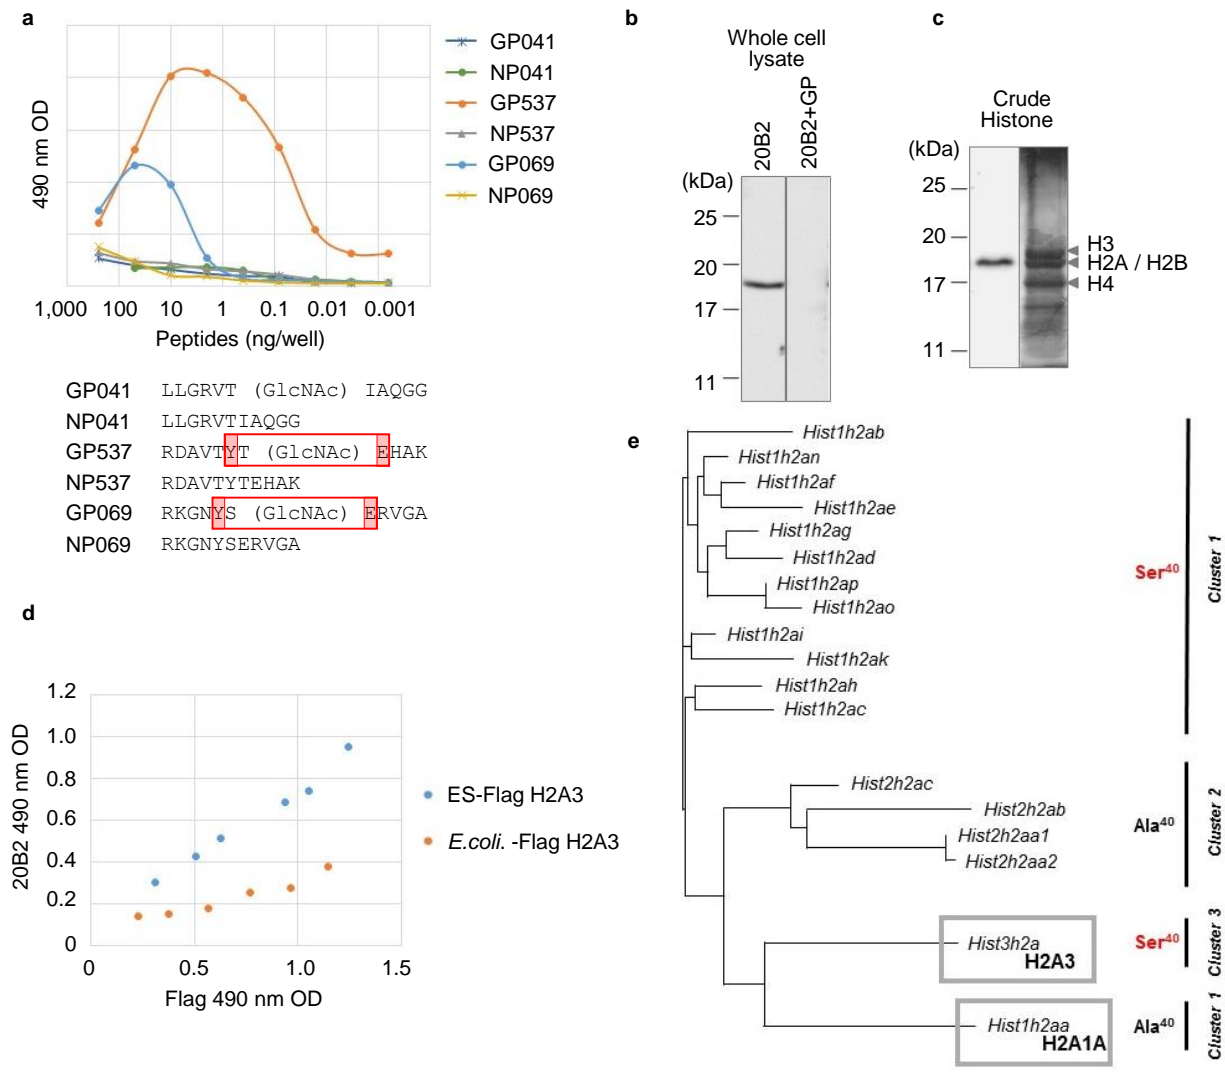

**Supplementary data Figure 1. Antigen specificity assay of the 20B2 monoclonal antibody and a phylogeny of H2A isoforms. a**, Synthetic peptides with (GP) or without (NP) *O*-GlcNAcylation were subjected to ELISA using 20B2 as a primary antibody. **b**, WB analysis of mESC whole-cell lysates with 20B2. There is a 20B2-positive band (left lane). The 20B2 band was vanished by pre-incubation with GP (1  $\mu$ g/ml) (right lane). **c**, WB analysis with 20B2 (left lane) and silver stained (right lane) crude histone extracts of mESCs. **d**, Purified Flag-tagged recombinant H2A3 produced by mESC (ES-FLAG H2A3, blue) was subjected to ELISA using 20B2 as a primary antibody. We used anti-FLAG antibody to normalize H2A3 levels. *E. coli* recombinant proteins (*E. coli*-FLAG H2A3, orange) were used for negative control of *O*-GlcNAc modification. **e**, Amino acid sequence-based phylogeny of genes for mouse canonical H2A isoforms. The amino acid at position 40 (Ser<sup>40</sup> or Ala<sup>40</sup>) and the gene cluster numbers are shown in the right margin.

MS/MS fragmentation of GNYSERVAGAPVYLAAVLEYLTAEILELAGNAARDNK

| b       | b++     | Res |        | y"      | y++     |
|---------|---------|-----|--------|---------|---------|
| 58.029  | 29.518  | 1   | Gly 38 | -       | -       |
| 172.072 | 86.54   | 2   | Asn 37 | 3922.04 | 1961.52 |
| 335.136 | 168.071 | 3   | Tyr 36 | 3807.99 | 1904.5  |
| 422.168 | 211.587 | 4   | Ser 35 | 3644.93 | 1822.97 |
| 551.21  | 276.109 | 5   | Glu 34 | 3557.9  | 1779.45 |
| 707.311 | 354.159 | 6   | Arg 33 | 3428.85 | 1714.93 |
| 806.38  | 403.693 | 7   | Val 32 | 3272.75 | 1636.88 |
| 863.401 | 432.204 | 8   | Gly 31 | 3173.69 | 1587.35 |
| 934.438 | 467.723 | 9   | Ala 30 | 3116.66 | 1558.84 |
| 991.46  | 496.234 | 10  | Gly 29 | 3045.63 | 1523.32 |
| 1062.5  | 531.752 | 11  | Ala 28 | 2988.61 | 1494.81 |
| 1159.55 | 580.278 | 12  | Pro 27 | 2917.57 | 1459.29 |
| 1258.62 | 629.813 | 13  | Val 26 | 2820.52 | 1410.76 |
| 1421.68 | 711.344 | 14  | Tyr 25 | 2721.45 | 1361.23 |
| 1534.77 | 767.886 | 15  | Leu 24 | 2558.38 | 1279.7  |
| 1605.8  | 803.405 | 16  | Ala 23 | 2445.3  | 1223.15 |
| 1676.84 | 838.923 | 17  | Ala 22 | 2374.26 | 1187.64 |
| 1775.91 | 888.458 | 18  | Val 21 | 2303.23 | 1152.12 |
| 1888.99 | 945     | 19  | Leu 20 | 2204.16 | 1102.58 |
| 2018.04 | 1009.52 | 20  | Glu 19 | 2091.07 | 1046.04 |
| 2181.1  | 1091.05 | 21  | Tyr 18 | 1962.03 | 981.518 |
| 2294.18 | 1147.6  | 22  | Leu 17 | 1798.97 | 899.987 |
| 2395.23 | 1198.12 | 23  | Thr 16 | 1685.88 | 843.445 |
| 2466.27 | 1233.64 | 24  | Ala 15 | 1584.84 | 792.921 |
| 2595.31 | 1298.16 | 25  | Glu 14 | 1513.8  | 757.402 |
| 2708.39 | 1354.7  | 26  | Ile 13 | 1384.76 | 692.881 |
| 2821.48 | 1411.24 | 27  | Leu 12 | 1271.67 | 636.339 |
| 2950.52 | 1475.76 | 28  | Glu 11 | 1158.59 | 579.797 |
| 3063.6  | 1532.31 | 29  | Leu 10 | 1029.54 | 515.276 |
| 3134.64 | 1567.82 | 30  | Ala 9  | 916.46  | 458.734 |
| 3191.66 | 1596.34 | 31  | Gly 8  | 845.423 | 423.215 |
| 3305.71 | 1653.36 | 32  | Asn 7  | 788.401 | 394.704 |
| 3376.74 | 1688.88 | 33  | Ala 6  | 674.359 | 337.683 |
| 3447.78 | 1724.39 | 34  | Ala 5  | 603.321 | 302.164 |
| 3603.88 | 1802.44 | 35  | Arg 4  | 532.284 | 266.646 |
| 3718.91 | 1859.96 | 36  | Asp 3  | 376.183 | 188.595 |
| 3832.95 | 1916.98 | 37  | Asn 2  | 261.156 | 131.082 |
| -       | -       | 38  | Lys 1  | 147.113 | 74.06   |

| b       | b++     | Res |               | y       | y++     | y+++    |
|---------|---------|-----|---------------|---------|---------|---------|
| 58.029  | 29.518  | 1   | Gly 38        | -       | -       | -       |
| 172.072 | 86.54   | 2   | Asn 37        | 4125.11 | 2063.06 | 1375.71 |
| 335.136 | 168.071 | 3   | Tyr 36        | 4011.07 | 2006.04 | 1337.7  |
| 625.247 | 313.127 | 4   | Ser-HexNAc 35 | 3848.01 | 1924.51 | 1283.34 |
| 754.29  | 377.648 | 5   | Glu 34        | 3557.9  | 1779.45 | 1186.64 |
| 910.391 | 455.699 | 6   | Arg 33        | 3428.85 | 1714.93 | 1143.62 |
| 1009.46 | 505.233 | 7   | Val 32        | 3272.75 | 1636.88 | 1091.59 |
| 1066.48 | 533.744 | 8   | Gly 31        | 3173.69 | 1587.35 | 1058.57 |
| 1137.52 | 569.262 | 9   | Ala 30        | 3116.66 | 1558.84 | 1039.56 |
| 1194.54 | 597.773 | 10  | Gly 29        | 3045.63 | 1523.32 | 1015.88 |
| 1265.58 | 633.292 | 11  | Ala 28        | 2988.61 | 1494.81 | 996.873 |
| 1362.63 | 681.818 | 12  | Pro 27        | 2917.57 | 1459.29 | 973.194 |
| 1461.7  | 731.352 | 13  | Val 26        | 2820.52 | 1410.76 | 940.843 |
| 1624.76 | 812.884 | 14  | Tyr 25        | 2721.45 | 1361.23 | 907.82  |
| 1737.85 | 869.426 | 15  | Leu 24        | 2558.38 | 1279.7  | 853.466 |
| 1808.88 | 904.945 | 16  | Ala 23        | 2445.3  | 1223.15 | 815.771 |
| 1879.92 | 940.463 | 17  | Ala 22        | 2374.26 | 1187.64 | 792.092 |
| 1978.99 | 989.997 | 18  | Val 21        | 2303.23 | 1152.12 | 768.413 |
| 2092.07 | 1046.54 | 19  | Leu 20        | 2204.16 | 1102.58 | 735.39  |
| 2221.11 | 1111.06 | 20  | Glu 19        | 2091.07 | 1046.04 | 697.696 |
| 2384.18 | 1192.59 | 21  | Tyr 18        | 1962.03 | 981.518 | 654.681 |
| 2497.26 | 1249.13 | 22  | Leu 17        | 1798.97 | 899.987 | 600.327 |
| 2598.31 | 1299.66 | 23  | Thr 16        | 1685.88 | 843.445 | 562.632 |
| 2669.35 | 1335.18 | 24  | Ala 15        | 1584.84 | 792.921 | 528.95  |
| 2798.39 | 1399.7  | 25  | Glu 14        | 1513.8  | 757.402 | 505.271 |
| 2911.47 | 1456.24 | 26  | Ile 13        | 1384.76 | 692.881 | 462.256 |
| 3024.56 | 1512.78 | 27  | Leu 12        | 1271.67 | 636.339 | 424.562 |
| 3153.6  | 1577.3  | 28  | Glu 11        | 1158.59 | 579.797 | 386.867 |
| 3266.68 | 1633.85 | 29  | Leu 10        | 1029.54 | 515.276 | 343.853 |
| 3337.72 | 1669.36 | 30  | Ala 9         | 916.46  | 458.734 | 306.158 |
| 3394.74 | 1697.88 | 31  | Gly 8         | 845.423 | 423.215 | 282.479 |
| 3508.79 | 1754.9  | 32  | Asn 7         | 788.401 | 394.704 | 263.472 |
| 3579.82 | 1790.42 | 33  | Ala 6         | 674.359 | 337.683 | 225.458 |
| 3650.86 | 1825.93 | 34  | Ala 5         | 603.321 | 302.164 | 201.779 |
| 3806.96 | 1903.98 | 35  | Arg 4         | 532.284 | 266.646 | 178.1   |
| 3921.99 | 1961.5  | 36  | Asp 3         | 376.183 | 188.595 | 126.066 |
| 4036.03 | 2018.52 | 37  | Asn 2         | 261.156 | 131.082 | 87.724  |
| -       | -       | 38  | Lys 1         | 147.113 | 74.06   | -       |

Supplementary data Figure 2. Mass spectrometry of G37-K74 peptide on H2A . Summary of the theoretical values of MS/MS fragments of G37-K74 peptide. The observed ions in Fig. 2b and 2c are written in red.

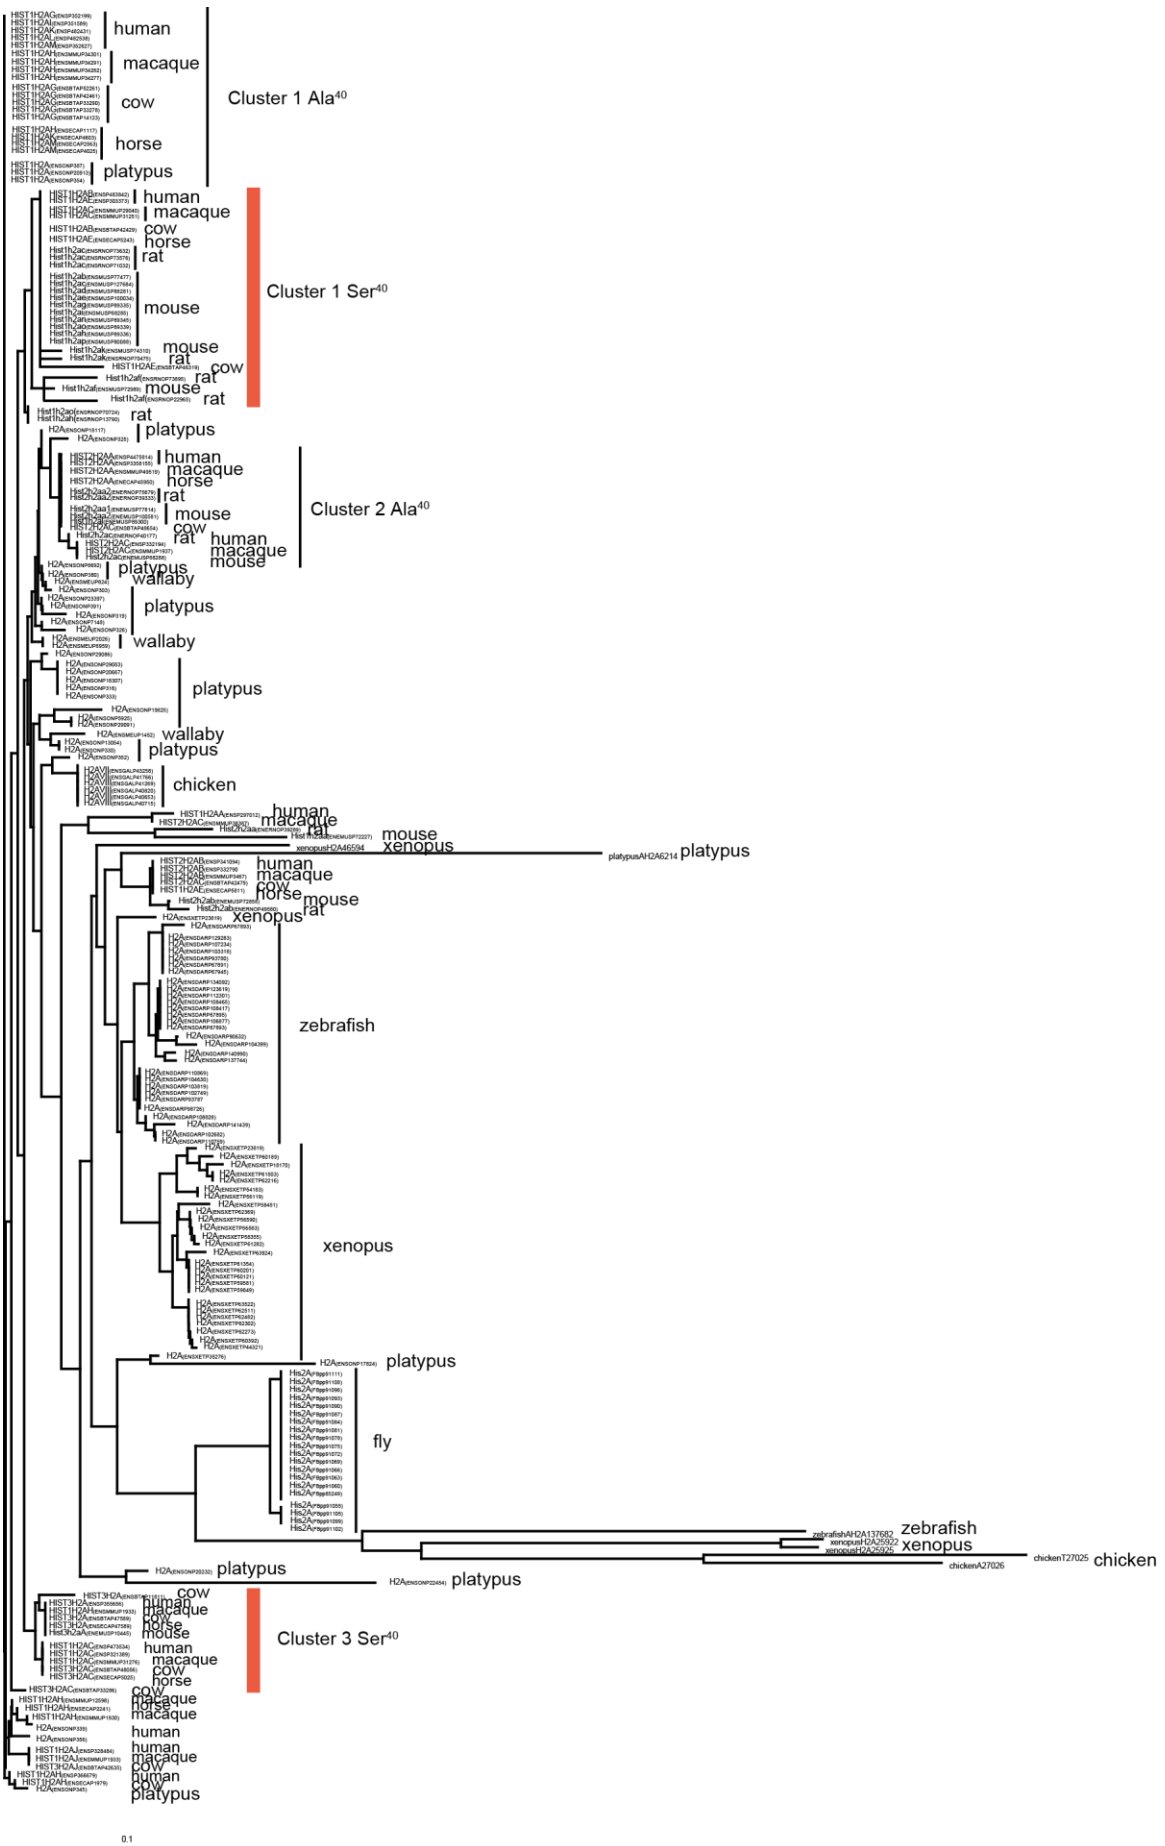

**Supplementary data Figure 3. Phylogeny of H2A isoforms of animals.** Phylogenetic relationship of canonical H2A proteins in selected animal species (human, macaque, cow, horse, rat, mouse, wallaby, platypus, chicken, frog or *Xenopus*, zebrafish, and fruit fly). The amino acid at position 40 (Ser<sup>40</sup> or Ala<sup>40</sup>) and the cluster numbers of genes for respective H2A isoforms are shown in the right margin.

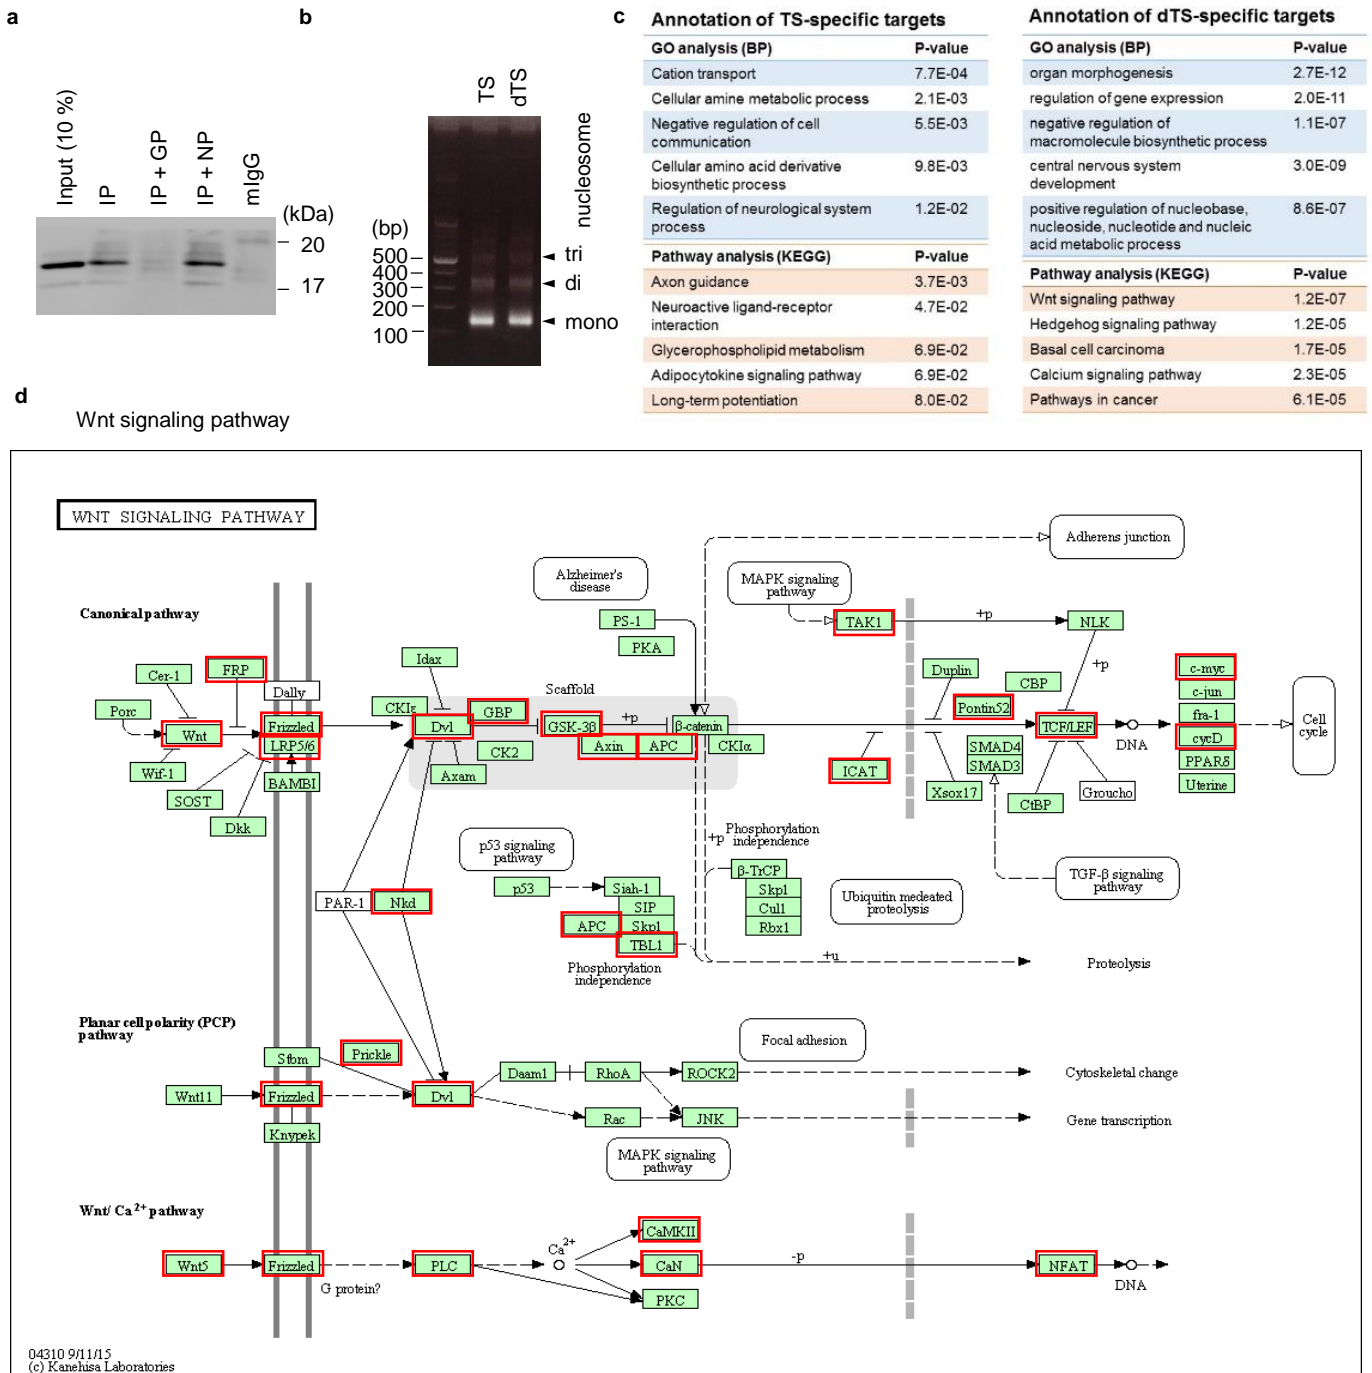

**Supplementary data Figure 4. ChIP-seq analysis of TS and dTS.** **a**, As the validation of 20B2 for ChIP, mESC chromatin (an equivalent amount of 1  $\mu$ g genomic DNA) and 3  $\mu$ g of 20B2 were used. The 20B2-positive band (IP) was vanished when 20B2 was pre-incubated with GP (IP+GP, 3  $\mu$ g GP), but not with NP (IP+NP, 3  $\mu$ g GP). Mouse IgG as a negative control. There was no long chromatin in both TS and dTS samples. **c**, The gene ontology enrichment analysis of biological processes and KEGG pathway analysis of genes harbouring H2AS40Gc. Top five categories for each analysis of TS-specific and dTS-specific target genes. **d**, H2AS40Gc target genes in dTS related to the Wnt signal pathway (red boxes).

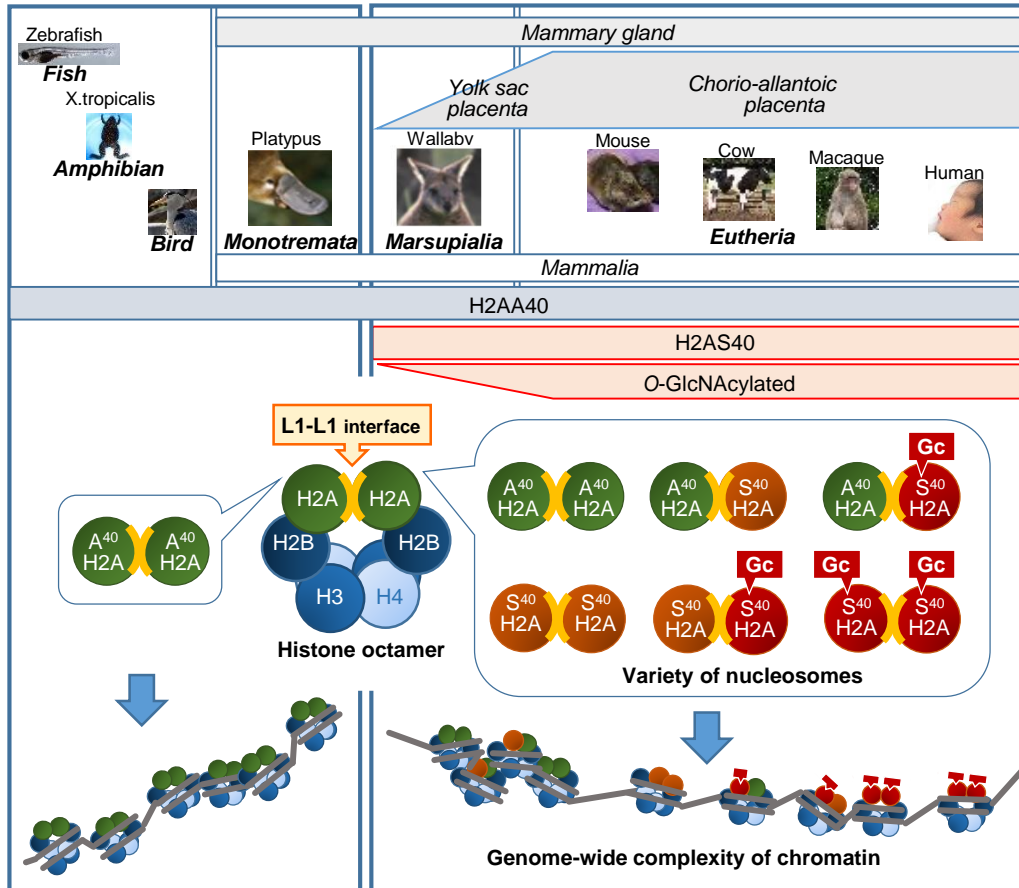

**Supplementary data Figure 5. Schematic model for the acquisition of H2A Ser<sup>40</sup> O-GlcNAcylation in the evolutionary process.** The emergence of the Ser<sup>40</sup> isoform of canonical H2A and its O-GlcNAcylation occurred at the time of the acquisition of placenta. In the histone octamer, two H2A molecules interact at the L1 loop of the globular domain where S40 can be O-GlcNAcylation. H2AS40Gc may produce complexity of the chromatin through the variety of nucleosomes.



| Primer name                         | Sequence                                                         |
|-------------------------------------|------------------------------------------------------------------|
| <b>3xFlag_H2A3_F1<sup>a</sup></b>   | AAAGATCATGATATCGATTACAAGGATGACGATGACAAGATGTCTGGTCGTGGCAAGCAGGGCG |
| <b>3xFlag_H2A3_R<sup>a, c</sup></b> | AAGAGCCTTTGGTGTCTGTAAAAGTC                                       |
| <b>3xFlag_F2<sup>c, d</sup></b>     | CACCATGGACTACAAAGACCATGACGGTGATTATAAAGATCATGATATCGATTACAAGG      |
| <b>3xFlag_R<sup>d</sup></b>         | CTACTTGTCATCGTCATC                                               |
| <b>H2A3-S40A_F<sup>e</sup></b>      | AATTATTCGGAGCGGGTGGGCGCTGGT                                      |
| <b>H2A3-S40A_R<sup>e</sup></b>      | CCGCTCCGAATAATTACCCTTACGGAG                                      |

**Supplementary data Table 1. Primer lists.** For construction of 3xFlag-fused H2A3 and H2A3-mutant overexpression vectors <sup>a-e</sup>, same alphabet indicate that primer is used as the combination.

Supplementary Information. Uncropped images with size marker indications

Fig. 1a

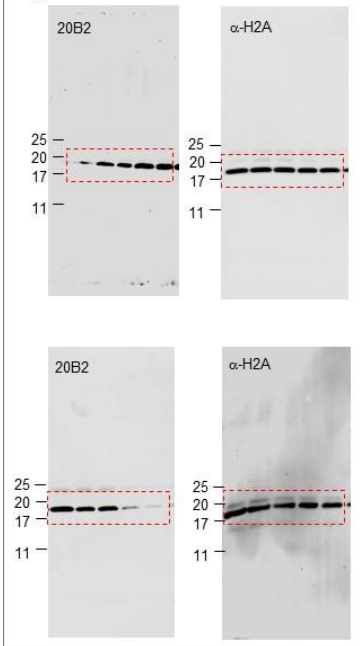

Fig. 1c

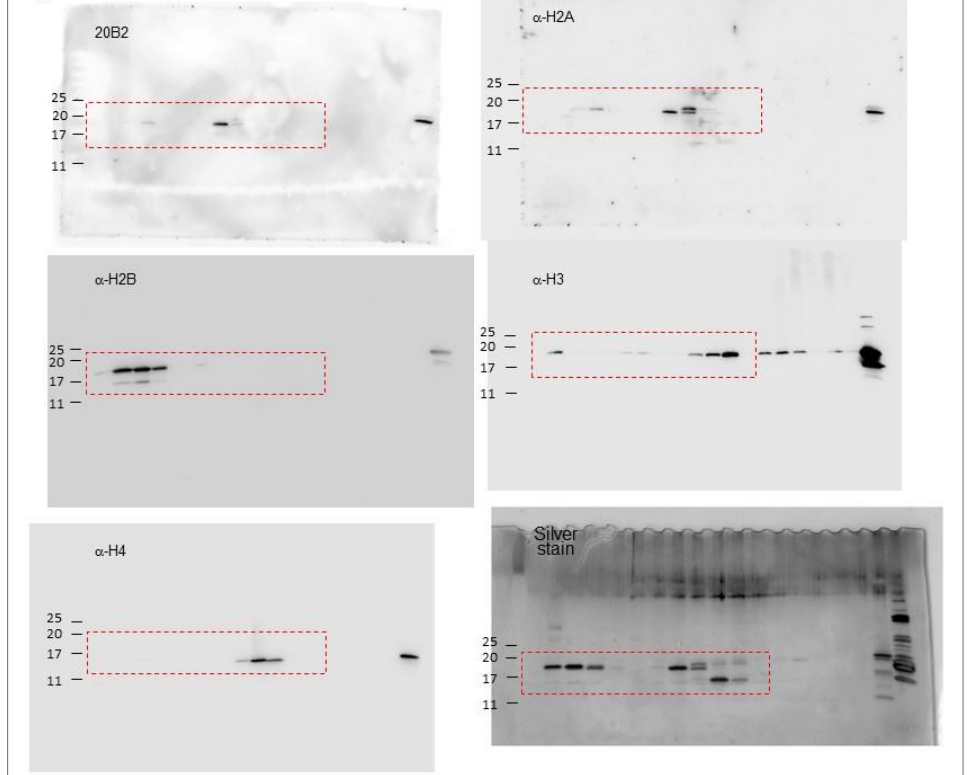

Fig. 1d

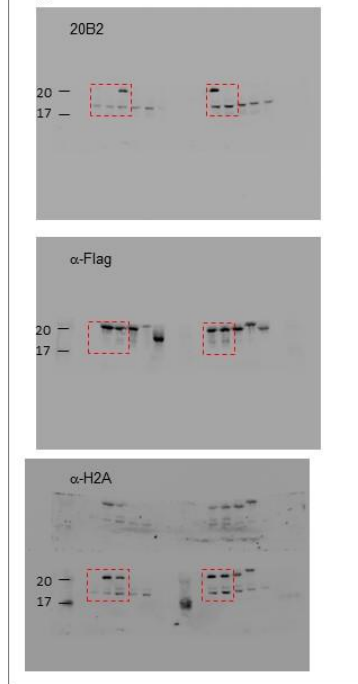

Fig. 2a

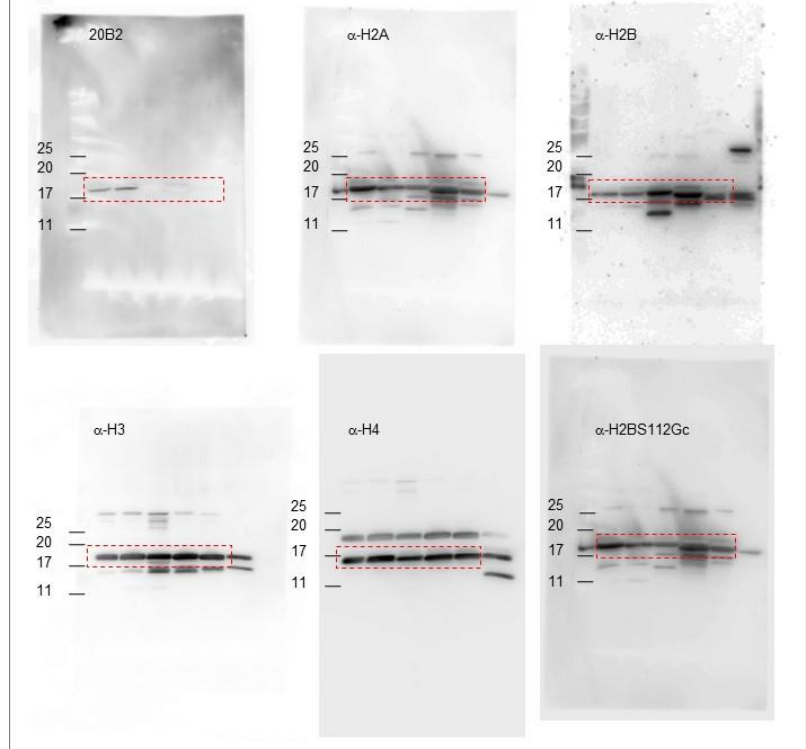

Supplementary Information. Uncropped images with size marker indications

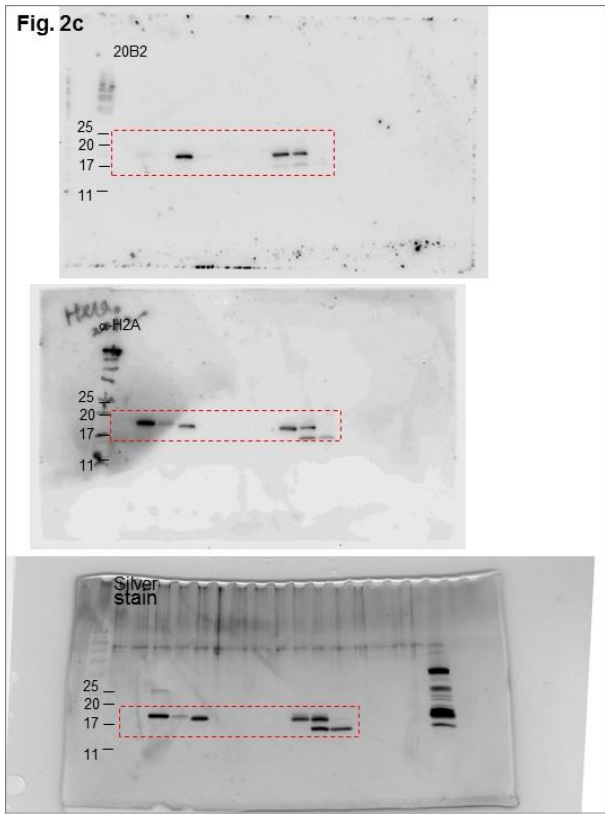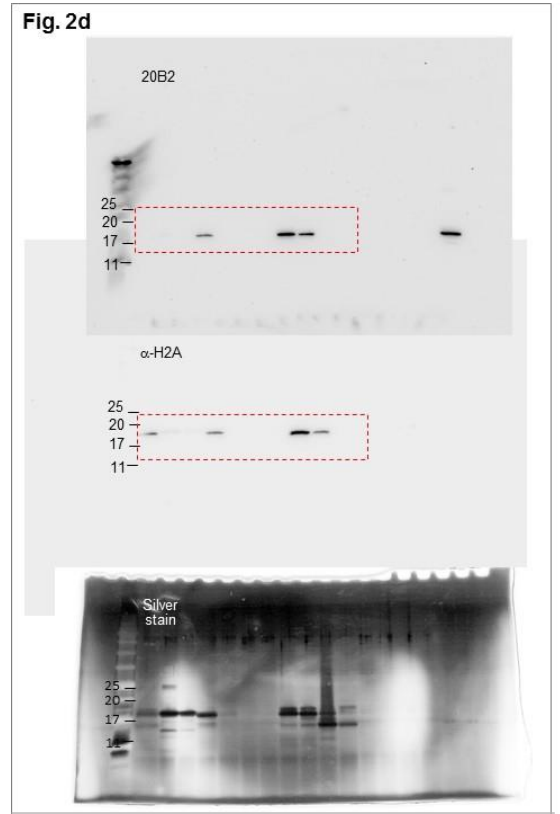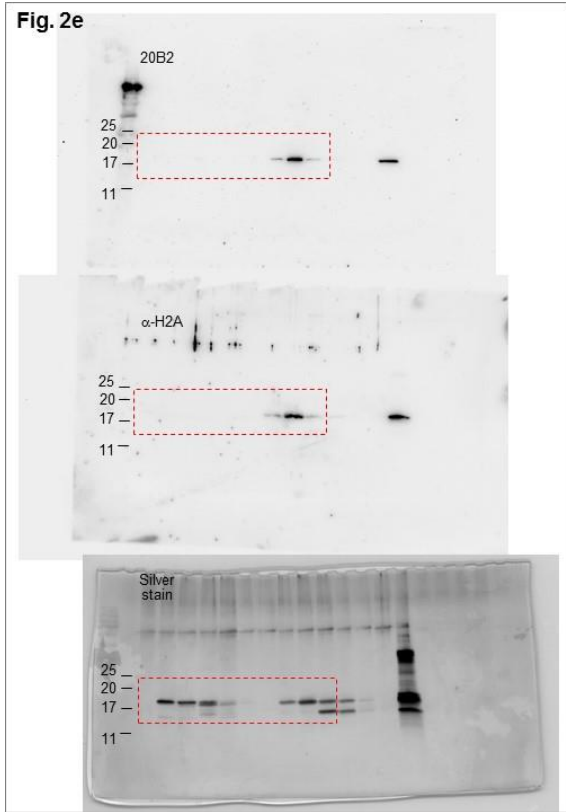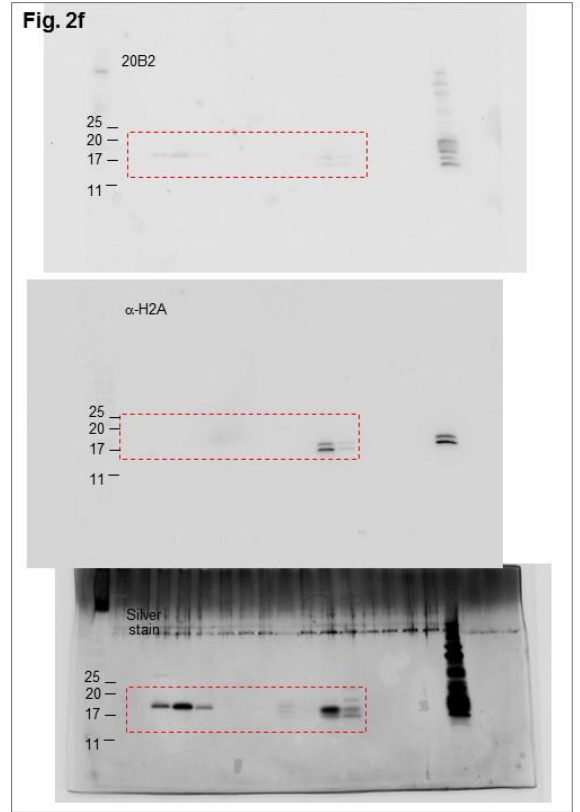

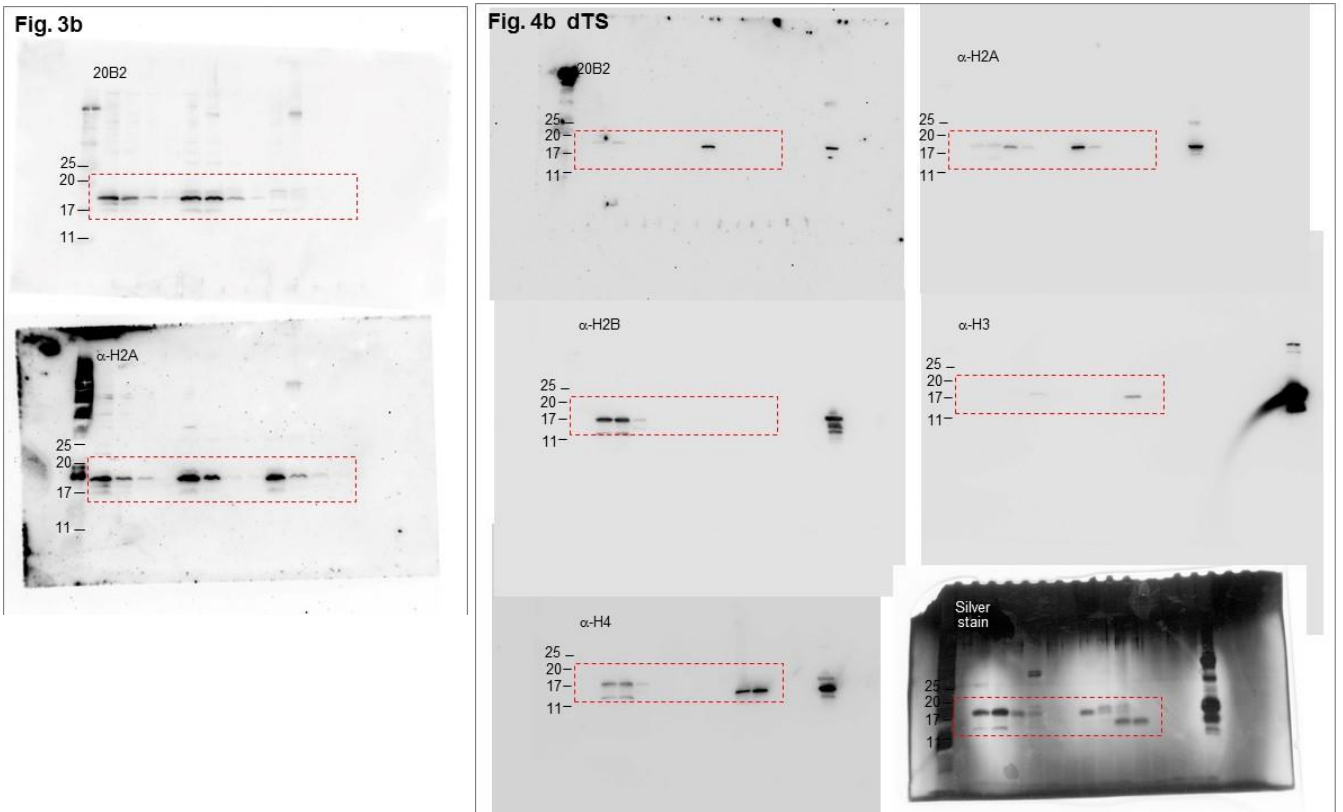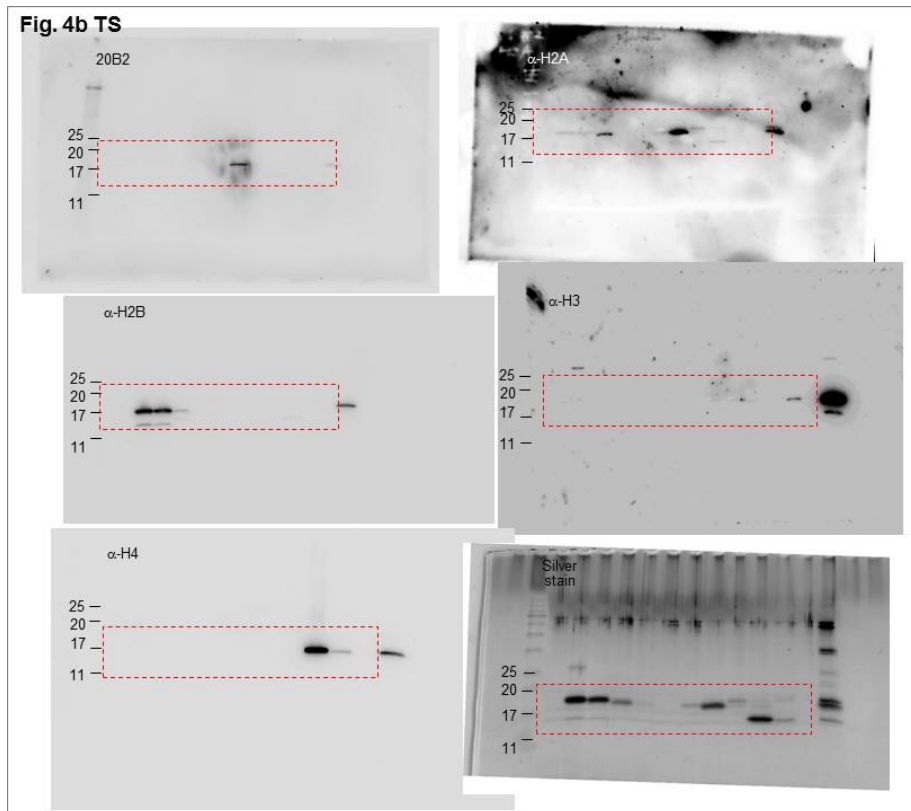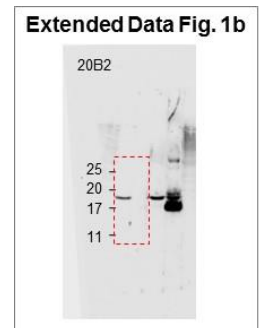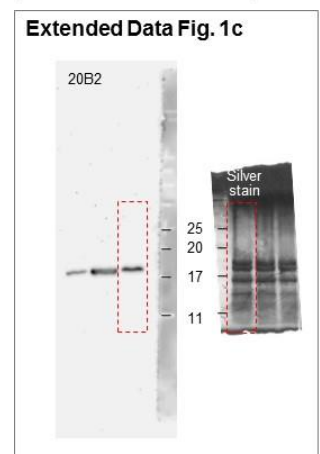

Supplementary Information. Uncropped images with size maker indications

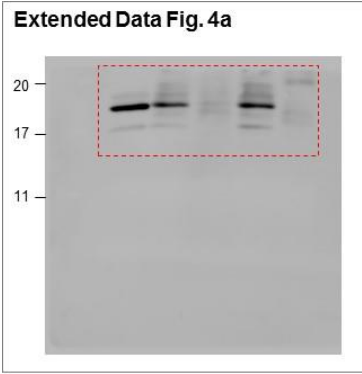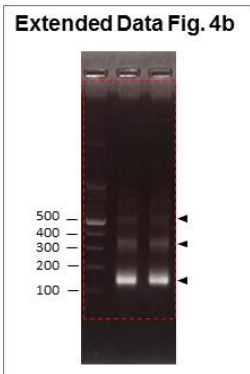

Supplement: srep31785-s1.pdf [file srep31785-s1.pdf]
